# Supplementary material for: Sustained Survival Benefit in Recurrent Medulloblastoma by a Metronomic Antiangiogenic Regimen: A Nonrandomized Controlled Trial
Source: PubMed Central journal article supplement (PMC10603581; doi:10.1001/jamaoncol.2023.4437), 2023-10-26
Supplement: jamaoncol-e234437-s002.pdf [file jamaoncol-e234437-s002.pdf]

## Supplementary Online Content

Peyrl A, Chocholous M, Sabel M, et al. Sustained survival benefit in recurrent medulloblastoma by a metronomic antiangiogenic regimen: a nonrandomized controlled trial. *JAMA Oncol*. Published online October 26, 2023. doi:10.1001/jamaoncol.2023.4437

**eFigure 1.** OS After 12 Months for Medulloblastoma Subgroup Distribution

**eFigure 2.** Kaplan-Meier Estimates of Survival Outcomes Regarding the Number of Relapses

**eFigure 3.** Kaplan-Meier Estimates of Survival Outcomes Regarding Intraventricular Liposomal Cytarabine (n=17) and Aqueous Cytarabine (n=24)

**eFigure 4.** Kaplan-Meier Estimates for PFS of Patients That Exhibited Disease Control (NED+CR+PR+SD)

**eFigure 5.** Kaplan-Meier Estimates for PFS of Patients That Exhibited Response (NED+CR+PR)

**eFigure 6.** Kaplan-Meier Estimates for PFS of Patients That Showed No Progression After 12 Months of MEMMAT Treatment

**eTable 1.** MEMMAT Regimen: Dosing Schedule

**eTable 2.** Dose Modifications of the MEMMAT Regimen

**eTable 3.** Results and Description of the Interim Analyses

**eTable 4.** Responders and Non-responders by Subgroup

**eTable 5.** All Treatment-Related AEs in the Study Population (N=40)

**eTable 6.** Quality of Life at the Beginning and After 6 Months of the MEMMAT Protocol

This supplementary material has been provided by the authors to give readers additional information about their work.

**eFigure 1.** OS after 12 months for medulloblastoma subgroup distribution; WNT, n=1, 0%; SHH, n=4, 25.0% ± 21.7; Group 3, n=12, 54.5% ± 15.0; Group 4, n=23, 78.3% ± 8.6; PFS progression-free survival; WNT, wingless; SHH, sonic hedgehog;

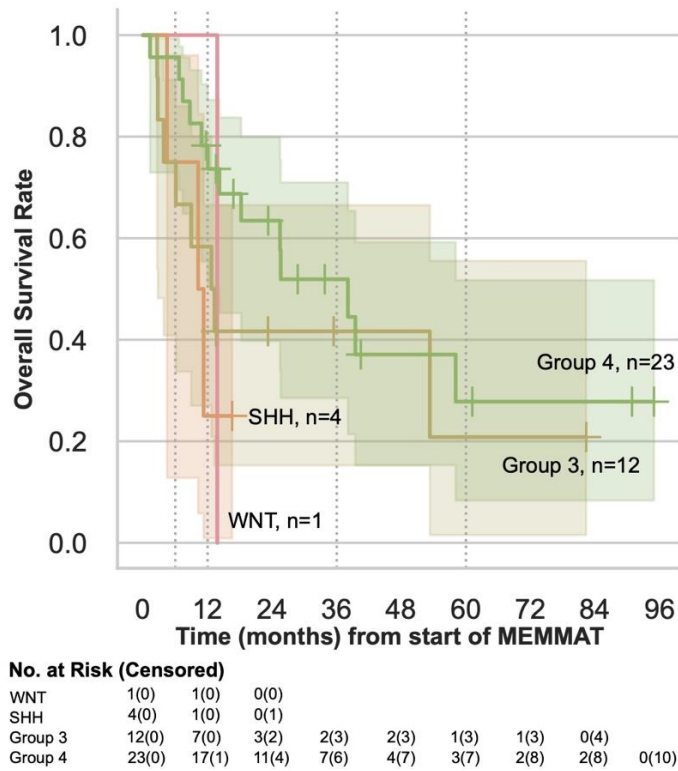

**eFigure 2.** Kaplan-Meier estimates of survival outcomes regarding the number of relapses; first relapse (n=30), 2<sup>nd</sup>/3<sup>rd</sup> relapse (n=10);

(A) PFS after 36 months: 1<sup>st</sup> relapse 28.0% ± 9.6; 2<sup>nd</sup>/3<sup>rd</sup> relapse 13.3% ± 12.0; p=0.340; p=0.814;

(B) OS after 36 months: 1<sup>st</sup> relapse 47.9% ± 10.0; 2<sup>nd</sup>/3<sup>rd</sup> relapse 30.0% ± 14.5; p=0.364; p=0.918;

A

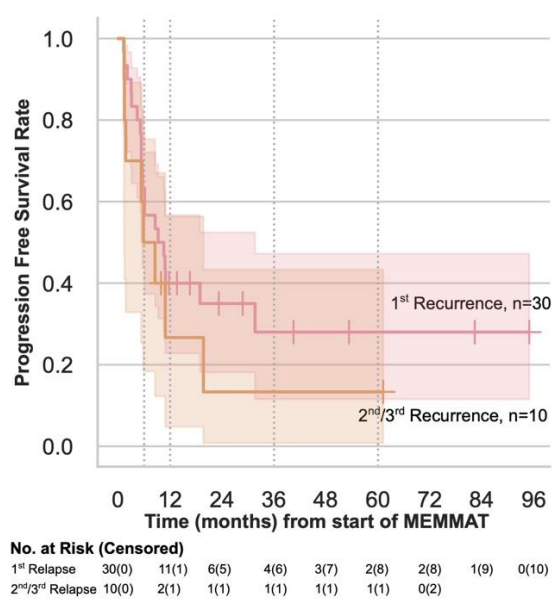

B

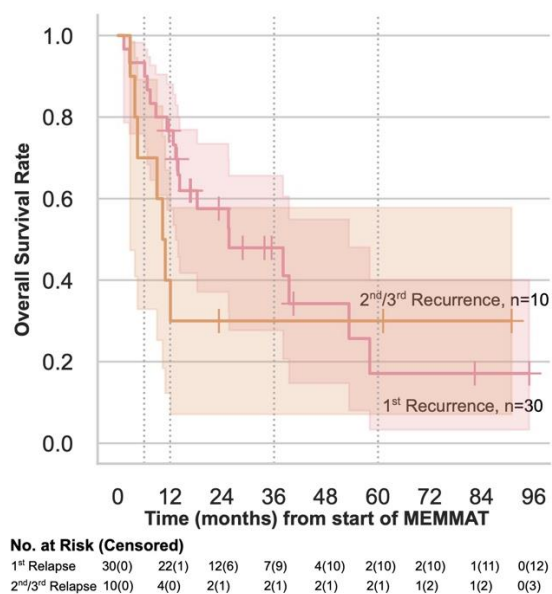

**eFigure 3.** Kaplan-Meier estimates of survival outcomes regarding intraventricular liposomal cytarabine (n=17) and aqueous cytarabine (n=24). (A) PFS after 36 months: Liposomal cytarabine 28.6% ± 11.8, aqueous cytarabine 25.0% ± 10.2; p=0.814;  
 B) OS after 36 months: Liposomal cytarabine 50.0% ± 12.5, aqueous cytarabine 33.3% ± 12.1; p=0.918;

A

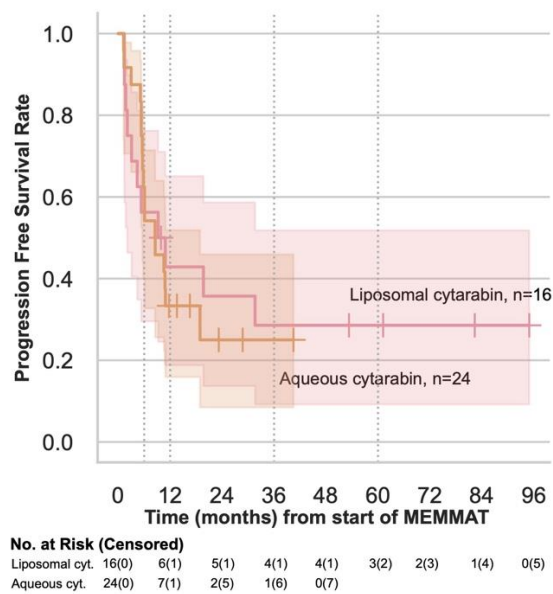

B

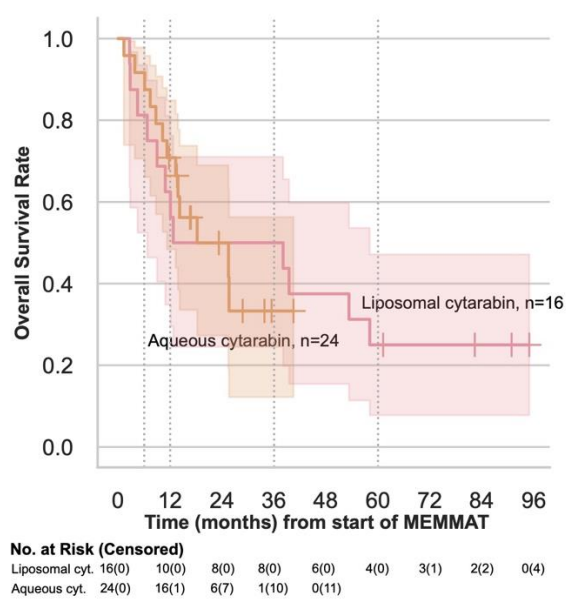

**eFigure 4.** Kaplan-Meier estimates for PFS of patients that exhibited disease control (NED+CR+PR+SD); median PFS: 31.6 (11.0-52.2) months; PFS after 60 months: 42.8% ± 12.4; PFS progression-free survival;

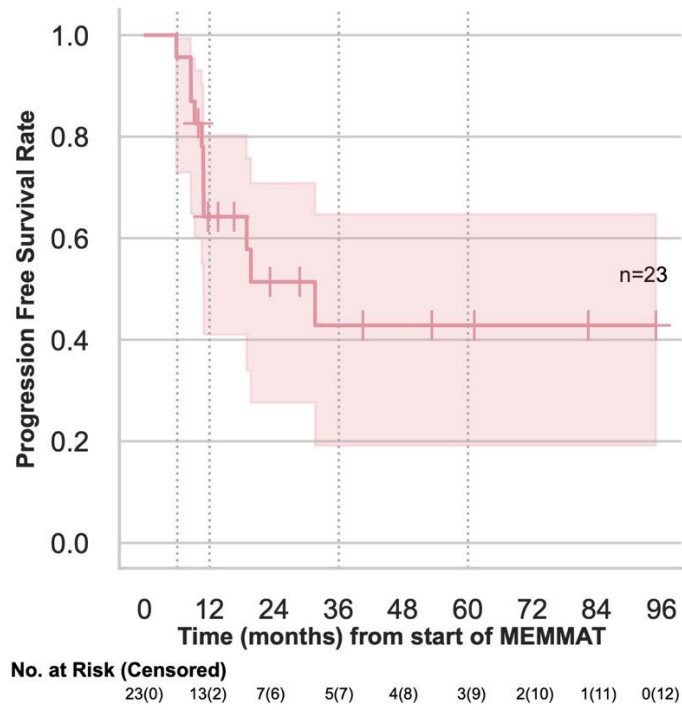

**eFigure 5.** Kaplan-Meier estimates for PFS of patients that exhibited response (NED+CR+PR); median PFS: 31.6 (11.0-52.2) months; PFS after 60 months: 49.7% ± 14.3; PFS progression-free survival;

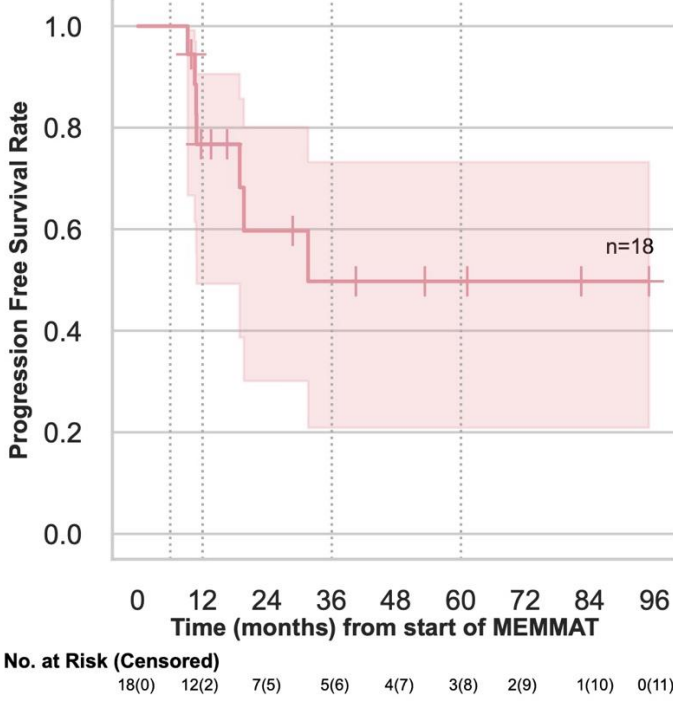

**eFigure 6.** Kaplan-Meier estimates for PFS of patients that showed no progression after 12 months of MEMMAT treatment; PFS after 60 months: 66.7% ± 16.1; PFS progression-free survival.

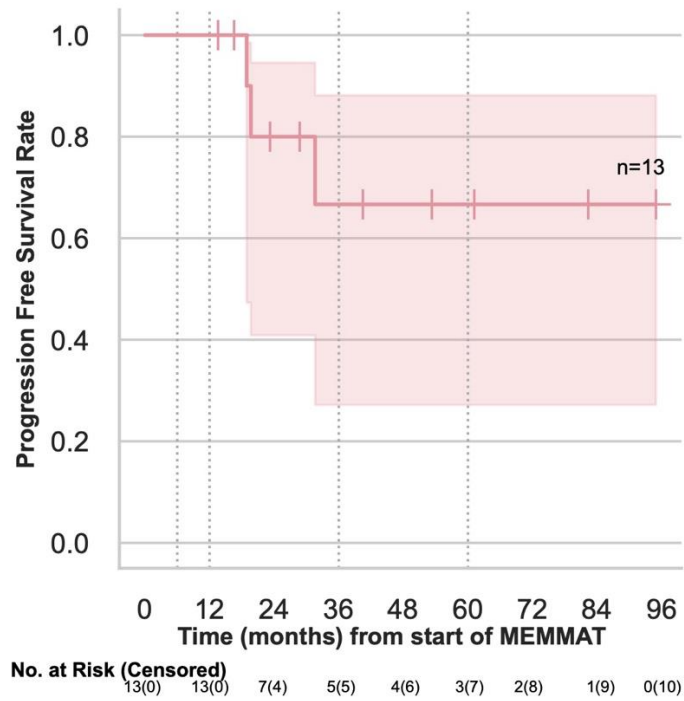

eTable 1. MEMMAT regimen: Dosing schedule.

| Medication                                                                    | Dosing schedule                                                                                                                                                                                                                                          |
|-------------------------------------------------------------------------------|----------------------------------------------------------------------------------------------------------------------------------------------------------------------------------------------------------------------------------------------------------|
| <b>Continuous oral</b>                                                        |                                                                                                                                                                                                                                                          |
| Thalidomide                                                                   | 3 mg/kg/day daily                                                                                                                                                                                                                                        |
| Celecoxib                                                                     | Initiated twice daily in patients <10 kg at 50 mg, in patients 10-35 kg at 100 mg; patients >20 kg increased the dose to 200 mg; patients >35 kg were initiated at 200 mg and increased the dose to 300 mg, patients >50 kg escalated the dose to 400 mg |
| Fenofibrate                                                                   | 90 mg/m <sup>2</sup> daily                                                                                                                                                                                                                               |
| Alternating 21-day courses                                                    |                                                                                                                                                                                                                                                          |
| Etoposide                                                                     | 35-50 mg/m <sup>2</sup> daily for 21 days depending on anticipated bone marrow tolerance                                                                                                                                                                 |
| Cyclophosphamide                                                              | 2.5 mg/kg daily for 21 days                                                                                                                                                                                                                              |
| <b>Intravenous</b>                                                            |                                                                                                                                                                                                                                                          |
| Bevacizumab                                                                   | 10 mg/kg every two weeks                                                                                                                                                                                                                                 |
| <b>Intraventricular, alternating etoposide and cytarabine every two weeks</b> |                                                                                                                                                                                                                                                          |
| Etoposide                                                                     | 0.5 mg on five consecutive days                                                                                                                                                                                                                          |
| Cytarabine                                                                    |                                                                                                                                                                                                                                                          |
| Liposomal cytarabine                                                          | 25 mg for children <3 years, 35 mg for children 3–9 years old and 50 mg for patients older than 9 years                                                                                                                                                  |
| Aqueous cytarabine (after withdrawal of liposomal cytarabine from the market) | 30 mg twice a week; <1 year 16 mg, >1 and <2 years 20 mg, >2 and <3 years 26 mg) on days 1, 4, 8 and 11                                                                                                                                                  |

Detailed guidelines to administer intraventricular chemotherapy via an Ommaya reservoir: Peyrl A, Chocholous M, Azizi AA, et al. Safety of Ommaya reservoirs in children with brain tumors: a 20-year experience with 5472 intraventricular drug administrations in 98 patients. *J Neurooncol.* 2014;120(1):139-45. doi: 10.1007/s11060-014-1531-1.



eTable 2. Dose modifications of the MEMMAT regimen.

| <b>Medication</b>           | <b>Suggested dose modification</b>                                                                                                                                                                                                                                                                                                            |
|-----------------------------|-----------------------------------------------------------------------------------------------------------------------------------------------------------------------------------------------------------------------------------------------------------------------------------------------------------------------------------------------|
| <b>Oral</b>                 |                                                                                                                                                                                                                                                                                                                                               |
| Etoposide, cyclophosphamide | If at any time during therapy ANC falls to $<1500/\text{mm}^3$ , then etoposide or cyclophosphamide should be reduced or held until the ANC returns to $\geq 1500/\text{mm}^3$ . Missed doses are not made up.                                                                                                                                |
| Thalidomide                 | Thalidomide should be reduced if signs of neuropathy are observed.                                                                                                                                                                                                                                                                            |
| Celecoxib                   | Celecoxib should be decreased to a lower dose level or held in case of increased creatinine.                                                                                                                                                                                                                                                  |
| Fenofibrate                 | If ALT is $<5x$ upper limit of normal, therapy with fenofibrate should be continued. If ALT is $\geq 5x$ normal, fenofibrate should be held until the level is $<3x$ normal. Fenofibrate dose should be reinitiated at 50% of the previous dose and escalated to 75% after 1 week, and then 100% after 1 week if the ALT remain $<3x$ normal. |
| <b>Intravenous</b>          |                                                                                                                                                                                                                                                                                                                                               |
| Bevacizumab                 | Delay: Hypertension grade 3 (despite medication), proteinuria grade 3; wound healing complications;                                                                                                                                                                                                                                           |
| <b>Intraventricular</b>     |                                                                                                                                                                                                                                                                                                                                               |
| Etoposide, cytarabine       | In case of side effects (i.e., headache, nausea, fatigue, ...), intraventricular chemotherapy should be delayed until side effects resolve.                                                                                                                                                                                                   |

All dose modifications should be based on the individual patient's circumstances and the physician's judgment, considering the updated SmPCs of all used drugs.

eTable 3. Results and Description of the Interim Analyses

|                                                  |
|--------------------------------------------------|
| <b>First interim analysis after 16 patients</b>  |
| CR (5), PR (4), PD (7); Drop-Out (1)             |
|                                                  |
| <b>Second interim analysis after 27 patients</b> |
| NED (1), CR (6), PR (6), SD (2), PD (12)         |

**First interim analysis:**

- In the first stage, 16 patients were recruited and their response to therapy was determined:
- If one or fewer of the 16 patients would have shown a response to therapy, this study with the retention of the null hypothesis would have been terminated.
- Since at least two patients showed a response to therapy, the study was resumed and a further 11 patients were recruited into stage 2.

**Second interim analysis:**

- In the second stage, the response to therapy of 27 patients was determined:
- If four or fewer of the 27 patients would have demonstrated a response to therapy, this study with the retention of the null hypothesis would have been terminated.
- Since at least five patients showed a response to therapy, the study was resumed and a further 11 patients were recruited to stage 3.

**Final analysis:**

- If 9 or fewer of the 38 recruited patients would have shown a response to therapy, then the study would have been terminated with the retention of the null hypothesis.
- Since ten or more patients demonstrated a response to therapy, the null hypothesis was rejected and the alternative hypothesis was accepted.

eTable 4. Responders and non-responders by subgroup.

| <b>Molecular subgroup at original diagnosis (n)</b> | <b>Best response (n)</b>                |
|-----------------------------------------------------|-----------------------------------------|
| WNT (1)                                             | PD (1)                                  |
| SHH (4)                                             | PR (1), SD (1), PD (2)                  |
| Group 3 (12)                                        | NED (1), CR (2), SD (2), PD (7)         |
| Group 4 (23)                                        | NED (2), CR (4), PR (8), SD (2), PD (7) |

eTable 5. All treatment-related AEs in the study population (n=40).

| AE                         | Number of patients (%) |           |           |          |          |            |
|----------------------------|------------------------|-----------|-----------|----------|----------|------------|
| <b>Hematologic</b>         |                        |           |           |          |          |            |
|                            | Grade 1                | Grade 2   | Grade 3   | Grade 4  | Grade 5  | Total      |
| Acute myeloid leukemia MLL |                        |           |           |          | 1 (2.5%) | 1 (2.5%)   |
| Anemia                     |                        | 5 (12.5%) | 5 (12.5%) |          |          | 10 (25%)   |
| Leucopenia                 |                        | 3 (7.5%)  | 2 (5%)    | 8 (20%)  |          | 13 (32.5%) |
| Lymphopenia                |                        | 2 (5%)    |           | 3 (7.5%) |          | 5 (12.5%)  |
| Neutropenia                | 3 (7.5%)               | 2 (5%)    | 3 (7.5%)  | 14 (35%) |          | 22 (55%)   |
| Platelet count decreased   | 1 (2.5%)               |           |           | 4 (10%)  |          | 5 (12.5%)  |

| <b>Neurologic</b>           |          |          |          |          |         |           |
|-----------------------------|----------|----------|----------|----------|---------|-----------|
|                             | Grade 1  | Grade 2  | Grade 3  | Grade 4  | Grade 5 | Total     |
| Cerebral Hemorrhage         | 1 (2.5%) |          |          |          |         | 1 (2.5%)  |
| Confusion                   |          | 2 (5%)   |          |          |         | 2 (5%)    |
| Diplopic images             | 3 (7.5%) | 1 (2.5%) |          |          |         | 4 (10%)   |
| Dizziness                   | 1 (2.5%) |          |          |          |         | 1 (2.5%)  |
| Dysarthria                  | 1 (2.5%) | 2 (5%)   |          |          |         | 3 (7.5%)  |
| Dysesthesia                 | 1 (2.5%) |          |          |          |         | 1 (2.5%)  |
| Fatigue                     | 2 (5%)   | 2 (5%)   | 1 (2.5%) |          |         | 5 (12.5%) |
| Headache                    | 4 (10%)  |          | 2 (5%)   |          |         | 6 (15%)   |
| Hearing impairment          |          | 1 (2.5%) |          | 1 (2.5%) |         | 2 (5%)    |
| Nausea                      | 3 (7.5%) |          |          |          |         | 3 (7.5%)  |
| Nystagmus                   | 1 (2.5%) |          |          |          |         | 1 (2.5%)  |
| Papilledema                 | 2 (5%)   |          |          |          |         | 2 (5%)    |
| Paresthesia                 | 3 (7.5%) |          |          |          |         | 3 (7.5%)  |
| Seizure                     | 3 (7.5%) | 1 (2.5%) | 2 (5%)   |          |         | 6 (15%)   |
| Sensomotoric polyneuropathy | 1 (2.5%) |          |          |          |         | 1 (2.5%)  |
| Tremor                      | 1 (2.5%) |          |          |          |         | 1 (2.5%)  |
| Weakness                    | 1 (2.5%) | 2 (5%)   |          |          |         | 3 (7.5%)  |

| <b>Gastrointestinal</b> |         |         |         |         |         |         |
|-------------------------|---------|---------|---------|---------|---------|---------|
|                         | Grade 1 | Grade 2 | Grade 3 | Grade 4 | Grade 5 | Total   |
| Constipation            | 4 (10%) |         |         |         |         | 4 (10%) |
| Diarrhea                | 2 (5%)  |         |         |         |         | 2 (5%)  |
| Vomiting                | 2 (5%)  |         |         |         |         | 2 (5%)  |

| <b>Infection</b>                  |                |                |                |                |                |              |
|-----------------------------------|----------------|----------------|----------------|----------------|----------------|--------------|
|                                   | <b>Grade 1</b> | <b>Grade 2</b> | <b>Grade 3</b> | <b>Grade 4</b> | <b>Grade 5</b> | <b>Total</b> |
| Cerebellitis                      |                |                | 1 (2.5%)       |                |                | 1 (2.5%)     |
| Chemical arachnoiditis            |                |                |                | 1 (2.5%)       |                | 1 (2.5%)     |
| Conjunctivitis                    | 1 (2.5%)       |                |                |                |                | 1 (2.5%)     |
| Febrile Neutropenia               |                |                | 2 (5%)         |                |                | 2 (5%)       |
| Fever                             |                | 1 (2.5%)       |                |                |                | 1 (2.5%)     |
| Gingivitis                        |                | 1 (2.5%)       |                |                |                | 1 (2.5%)     |
| Infection, NOS                    | 2 (5%)         | 3 (7.5%)       | 3 (7.5%)       | 1 (2.5%)       |                | 9 (22.5%)    |
| Meningitis                        |                |                | 2 (5%)         |                |                | 2 (5%)       |
| Mucositis                         | 1 (2.5%)       |                | 1 (2.5%)       |                |                | 2 (5%)       |
| Sepsis                            |                |                |                | 1 (2.5%)       |                | 1 (2.5%)     |
| Upper respiratory tract infection |                | 2 (5%)         |                |                |                | 2 (5%)       |
| Urinary tract infection           |                |                | 1 (2.5%)       |                |                | 1 (2.5%)     |

| <b>Laboratory</b>         |                |                |                |                |                |              |
|---------------------------|----------------|----------------|----------------|----------------|----------------|--------------|
|                           | <b>Grade 1</b> | <b>Grade 2</b> | <b>Grade 3</b> | <b>Grade 4</b> | <b>Grade 5</b> | <b>Total</b> |
| Elevated liver enzymes    | 3 (7.5%)       |                | 2 (5%)         |                |                | 5 (12.5%)    |
| Elevated renal parameters | 1 (2.5%)       | 1 (2.5%)       |                |                |                | 2 (5%)       |
| Hematuria                 | 1 (2.5%)       |                |                |                |                | 1 (2.5%)     |
| Hyperuricemia             | 1 (2.5%)       |                |                |                |                | 1 (2.5%)     |
| Hypomagnesemia            |                | 1 (2.5%)       |                |                |                | 1 (2.5%)     |
| Hyponatremia              | 3 (7.5%)       |                | 3 (7.5%)       |                |                | 6 (12.5%)    |

| <b>Various</b>       |                |                |                |                |                |              |
|----------------------|----------------|----------------|----------------|----------------|----------------|--------------|
|                      | <b>Grade 1</b> | <b>Grade 2</b> | <b>Grade 3</b> | <b>Grade 4</b> | <b>Grade 5</b> | <b>Total</b> |
| Alopecia             | 3 (7.5%)       |                |                |                |                | 3 (7.5%)     |
| Anorexia             | 2 (5%)         | 1 (2.5%)       |                |                |                | 3 (7.5%)     |
| Dry eyes             | 1 (2.5%)       |                |                |                |                | 1 (2.5%)     |
| Epistaxis            |                |                | 1 (2.5%)       |                |                | 1 (2.5%)     |
| Hypertension         |                | 1 (2.5%)       | 2 (5%)         |                |                | 3 (7.5%)     |
| Port a Cath revision | 1 (2.5%)       |                |                |                |                | 1 (2.5%)     |
| Proteinuria          |                |                | 2 (5%)         |                |                | 2 (5%)       |
| Wound dehiscence     |                | 1 (2.5%)       | 1 (2.5%)       |                |                | 2 (5%)       |

eTable 6. Quality of Life at the beginning and after 6 months of the MEMMAT protocol.

| timepoint<br>* | Self report |           |               |           |            |           | Parent report |      |               |           |            |           |
|----------------|-------------|-----------|---------------|-----------|------------|-----------|---------------|------|---------------|-----------|------------|-----------|
|                | t0          | t6mo      | t0            | t6mo      | t0         | t6mo      | t0            | t6mo | t0            | t6mo      | t0         | t6mo      |
| <i>QoL</i>     | <i>high</i> |           | <i>Medium</i> |           | <i>low</i> |           | <i>high</i>   |      | <i>medium</i> |           | <i>low</i> |           |
| %              | 12,4<br>0   | 12,5<br>0 | 46,0<br>0     | 56,2<br>5 | 41,6<br>0  | 31,2<br>5 | 6,9<br>0      | 5,60 | 41,0<br>0     | 50,0<br>0 | 52,0<br>0  | 44,4<br>0 |

t0: start of protocol; t6mo: after 6 months
