# Supplementary material for: Sustained Survival Benefit in Recurrent Medulloblastoma by a Metronomic Antiangiogenic Regimen: A Nonrandomized Controlled Trial
Source: PubMed Central journal article supplement (PMC10603581; doi:10.1001/jamaoncol.2023.4437), 2023-10-26
Supplement: jamaoncol-e234437-s003.pdf [file jamaoncol-e234437-s003.pdf]

## Data Sharing Statement

Peyrl. Sustained Survival Benefit in Recurrent Medulloblastoma by a Metronomic Antiangiogenic Regimen. *JAMA Oncol.* Published October 26, 2023.  
doi:10.1001/jamaoncol.2023.4437

### Data

**Data available:** Yes

**Data types:** Deidentified participant data

**How to access data:** Data are available upon reasonable request.

**When available:** With publication

### Supporting Documents

**Document types:** Statistical/analytic code, Informed consent form

**How to access documents:** [Andreas.peyrl@meduniwien.ac.at](mailto:Andreas.peyrl@meduniwien.ac.at)

**When available:** With publication

### Additional Information

**Who can access the data:** Anyone requesting the data

**Types of analyses:** for scientific research

**Mechanisms of data availability:** with a signed data access agreement
